# Supplementary material for: The risk of adverse clinical outcomes following treatment of Plasmodium vivax malaria with and without primaquine in Papua, Indonesia
Source: PubMed Central journal article supplement (PMC7657498; doi:10.1371/journal.pntd.0008838), 2020-11-11
Supplement: pntd.0008838.s004.pdf [file pntd.0008838.s004.pdf]

**S2 Table.** Baseline risk factors for any representation to hospital within 30 days after treatment with different doses of primaquine

|                                     | Cumulative risk in % (95% CI) | Unadjusted Hazard Ratio (95% CI) | P       | Adjusted Hazard Ratio <sup>1</sup> (95% CI) | P       |
|-------------------------------------|-------------------------------|----------------------------------|---------|---------------------------------------------|---------|
| <b>Initial Species</b>              |                               |                                  |         |                                             |         |
| Pure <i>P. vivax</i>                | 28.55 (27.90-29.21)           | Reference                        |         | Reference                                   |         |
| Mixed <i>P. vivax/P. falciparum</i> | 26.88 (25.91-27.88)           | 0.93 (0.89-0.98)                 | 0.007   | 0.92 (1.01-1.17)                            | 0.003   |
| <b>Sex</b>                          |                               |                                  |         |                                             |         |
| Male                                | 25.85 (25.13-26.60)           | Reference                        |         | Reference                                   |         |
| Female                              | 30.47 (29.67-31.29)           | 1.21 (1.16-1.27)                 | <0.0001 | 1.17 (1.11-1.22)                            | <0.0001 |
| <b>Ethnicity</b>                    |                               |                                  |         |                                             |         |
| Non-Papuan                          | 19.62 (18.43-20.87)           | Reference                        |         | Reference                                   |         |
| Highland                            | 30.47 (29.83-31.12)           | 1.63 (1.52-1.76)                 | <0.0001 | 1.64 (1.52-1.77)                            | <0.0001 |
| Lowland                             | 22.11 (20.42-23.91)           | 1.13 (1.01-1.27)                 | 0.032   | 1.12 (1.00-1.26)                            | 0.058   |
| <b>Age</b>                          |                               |                                  |         |                                             |         |
| 1 to <5 years                       | 33.99 (32.71-35.30)           | 1.23 (1.17-1.30)                 | <0.0001 | 1.21 (1.14-1.28)                            | <0.0001 |
| 5 to <15 years                      | 21.65 (20.49-22.87)           | 0.75 (0.70-0.80)                 | <0.0001 | 0.73 (0.68-0.78)                            | <0.0001 |
| ≥15 years                           | 27.99 (27.31-28.69)           | Reference                        |         | Reference                                   |         |
| <b>Admission Status</b>             |                               |                                  |         |                                             |         |
| Outpatient                          | 27.78 (27.21-28.36)           | Reference                        |         | Reference                                   |         |
| Inpatient                           | 30.45 (28.75-32.23)           | 1.09 (1.02-1.17)                 | 0.017   | 1.09 (1.01-1.17)                            | 0.023   |

<sup>1</sup> Cox model stratified by year and PQ treatment, and adjusted for species at enrolment, sex, ethnicity, admission status and age.
