# Supplementary material for: The risk of adverse clinical outcomes following treatment of Plasmodium vivax malaria with and without primaquine in Papua, Indonesia
Source: PubMed Central journal article supplement (PMC7657498; doi:10.1371/journal.pntd.0008838), 2020-11-11
Supplement: pntd.0008838.s005.pdf [file pntd.0008838.s005.pdf]

**S3 Table.** Baseline risk factors for hospitalization within 30 days after treatment with different doses of primaquine in patients initially treated as outpatients

|                                     | <b>Cumulative risk<br/>in % (95% CI)</b> | <b>Unadjusted<br/>Hazard Ratio<br/>(95% CI)</b> | <b>P</b> | <b>Adjusted Hazard<br/>Ratio<sup>1</sup><br/>(95% CI)</b> | <b>P</b> |
|-------------------------------------|------------------------------------------|-------------------------------------------------|----------|-----------------------------------------------------------|----------|
| <b>Initial Species</b>              |                                          |                                                 |          |                                                           |          |
| Pure <i>P. vivax</i>                | 1.81 (1.62-2.02)                         | Reference                                       |          | Reference                                                 |          |
| Mixed <i>P. vivax/P. falciparum</i> | 1.98 (1.68-2.35)                         | 1.10 (0.89-1.35)                                | 0.364    | 1.13 (0.91-1.39)                                          | 0.275    |
| <b>Sex</b>                          |                                          |                                                 |          |                                                           |          |
| Male                                | 1.66 (1.45-1.90)                         | Reference                                       |          | Reference                                                 |          |
| Female                              | 2.08 (1.83-2.36)                         | 1.25 (1.04-1.51)                                | 0.019    | 1.16 (0.96-1.40)                                          | 0.128    |
| <b>Ethnicity</b>                    |                                          |                                                 |          |                                                           |          |
| Non-Papuan                          | 0.86 (0.60-1.22)                         | Reference                                       |          | Reference                                                 |          |
| Highland                            | 2.09 (1.89-2.31)                         | 2.45 (1.69-3.56)                                | <0.005   | 2.22 (1.52-2.24)                                          | <0.001   |
| Lowland                             | 1.55 (1.09-2.21)                         | 1.82 (1.10-3.02)                                | 0.020    | 1.50 (0.90-2.52)                                          | 0.122    |
| <b>Age</b>                          |                                          |                                                 |          |                                                           |          |
| 1 to <5 years                       | 3.25 (2.77-3.80)                         | 1.95 (1.59-2.40)                                | <0.005   | 1.90 (1.53-2.35)                                          | <0.001   |
| 5 to <15 years                      | 1.01 (0.75-1.36)                         | 0.60 (0.43-0.83)                                | 0.002    | 0.59 (0.43-0.82)                                          | 0.001    |
| ≥15 years                           | 1.67 (1.48-1.90)                         | Reference                                       |          | Reference                                                 |          |

<sup>1</sup> Cox model stratified by year and PQ treatment and adjusted for species at enrolment, sex, ethnicity and age.
