# Supplementary material for: The risk of adverse clinical outcomes following treatment of Plasmodium vivax malaria with and without primaquine in Papua, Indonesia
Source: PubMed Central journal article supplement (PMC7657498; doi:10.1371/journal.pntd.0008838), 2020-11-11
Supplement: pntd.0008838.s006.pdf [file pntd.0008838.s006.pdf]

**S4 Table.** Baseline risk factors for dying within 30 days after treatment with different doses of primaquine

|                                     | <b>Cumulative risk in % (95% CI)</b> | <b>Unadjusted Hazard Ratio (95% CI)</b> | <b>P</b> | <b>Adjusted Hazard Ratio<sup>1</sup> (95% CI)</b> | <b>P</b> |
|-------------------------------------|--------------------------------------|-----------------------------------------|----------|---------------------------------------------------|----------|
| <b>Initial Species</b>              |                                      |                                         |          |                                                   |          |
| Pure <i>P. vivax</i>                | 0.26 (0.19-0.34)                     | Reference                               |          | Reference                                         |          |
| Mixed <i>P. vivax/P. falciparum</i> | 0.36 (0.25-0.52)                     | 1.39 (0.87-2.23)                        | 0.163    | 0.95 (0.58-1.55)                                  | 0.847    |
| <b>Sex</b>                          |                                      |                                         |          |                                                   |          |
| Male                                | 0.37 (0.28-0.48)                     | Reference                               |          | Reference                                         |          |
| Female                              | 0.20 (0.14-0.30)                     | 0.55 (0.34-0.89)                        | 0.015    | 0.53 (0.33-0.87)                                  | 0.001    |
| <b>Ethnicity</b>                    |                                      |                                         |          |                                                   |          |
| Non-Papuan                          | 0.27 (0.15-0.49)                     | Reference                               |          | Reference                                         |          |
| Highland                            | 0.26 (0.20-0.35)                     | 0.98 (0.51-1.87)                        | 0.944    | 1.53 (0.78-3.00)                                  | 0.212    |
| Lowland                             | 0.55 (0.31-0.96)                     | 2.04 (0.90-4.62)                        | 0.088    | 3.22 (1.38-7.56)                                  | 0.007    |
| <b>Age</b>                          |                                      |                                         |          |                                                   |          |
| 1 to <5 years                       | 0.27 (0.16-0.46)                     | 0.77 (0.43-1.39)                        | 0.392    | 0.63 (0.34-1.16)                                  | 0.137    |
| 5 to <15 years                      | 0.09 (0.03-0.23)                     | 0.25 (0.09-0.68)                        | 0.007    | 0.27 (0.10-0.75)                                  | 0.012    |
| ≥15 years                           | 0.35 (0.27-0.45)                     | Reference                               |          | Reference                                         |          |
| <b>Admission Status</b>             |                                      |                                         |          |                                                   |          |
| Outpatient                          | 0.11 (0.07-0.16)                     | Reference                               |          | Reference                                         |          |
| Inpatient                           | 1.83 (1.39-2.40)                     | 17.22 (10.66-27.83)                     | <0.0001  | 16.62 (10.09-27.35)                               | <0.0001  |

<sup>1</sup> Cox model stratified by year and PQ treatment and adjusted for species at enrolment, sex, ethnicity, age, and admission status
