# Supplementary material for: The risk of adverse clinical outcomes following treatment of Plasmodium vivax malaria with and without primaquine in Papua, Indonesia
Source: PubMed Central journal article supplement (PMC7657498; doi:10.1371/journal.pntd.0008838), 2020-11-11
Supplement: pntd.0008838.s007.pdf [file pntd.0008838.s007.pdf]

**S5 Table:** Haematological and clinical details of the 75 patients who died

| Patient number | Age category | Sex | Ethnic group | Malaria species at presentation | Hb (g/dl) at initial presentation | Lowest Hb (g/dl) during follow up | Number of days between presentation and lowest Hb | Number of days between presentation and death | Schizontocidal drugs    | PQ dose   | Clinical diagnosis assigned between presentation and death |
|----------------|--------------|-----|--------------|---------------------------------|-----------------------------------|-----------------------------------|---------------------------------------------------|-----------------------------------------------|-------------------------|-----------|------------------------------------------------------------|
| 1              | >=15yr       | M   | LP           | <i>P. vivax</i>                 | 10.5                              | .                                 | .                                                 | 3                                             | IV artesunate           | High dose | Septic shock                                               |
|                |              |     |              |                                 |                                   |                                   |                                                   |                                               |                         |           | Acute MI                                                   |
|                |              |     |              |                                 |                                   |                                   |                                                   |                                               |                         |           | Pericardial disease                                        |
|                |              |     |              |                                 |                                   |                                   |                                                   |                                               |                         |           | Bronchopneumonia                                           |
|                |              |     |              |                                 |                                   |                                   |                                                   |                                               |                         |           | COPD                                                       |
| 2              | >=15yr       | M   | HP           | Mixed species                   | 4.1                               | 5.1                               | 24                                                | 30                                            | IV artesunate / DHA+PIP | High dose | Hypertension                                               |
|                |              |     |              |                                 |                                   |                                   |                                                   |                                               |                         |           | Chronic renal failure                                      |
|                |              |     |              |                                 |                                   |                                   |                                                   |                                               |                         |           | Pancytopenia                                               |
|                |              |     |              |                                 |                                   |                                   |                                                   |                                               |                         |           | Pulmonary oedema                                           |
| 3              | >=15yr       | F   | HP           | Mixed species                   | 3                                 | .                                 | .                                                 | 6                                             | IV artesunate / DHA+PIP | High dose | -                                                          |
| 4              | >=15yr       | M   | HP           | <i>P. vivax</i>                 | .                                 | 4.7                               | 6                                                 | 11                                            | DHA+PIP                 | High dose | Chronic bronchitis                                         |
|                |              |     |              |                                 |                                   |                                   |                                                   |                                               |                         |           | Chronic renal failure                                      |
|                |              |     |              |                                 |                                   |                                   |                                                   |                                               |                         |           | Hepatitis C                                                |
|                |              |     |              |                                 |                                   |                                   |                                                   |                                               |                         |           | HIV                                                        |
| 5              | >=15yr       | M   | HP           | Mixed species                   | 8.9                               | .                                 | .                                                 | 3                                             | IV artesunate / DHA+PIP | High dose | COPD                                                       |
|                |              |     |              |                                 |                                   |                                   |                                                   |                                               |                         |           | Chronic renal failure                                      |
|                |              |     |              |                                 |                                   |                                   |                                                   |                                               |                         |           | Supraventricular tachycardia                               |
| 6              | >=15yr       | M   | HP           | Mixed species                   | 5.3                               | .                                 | .                                                 | 5                                             | IV artesunate / DHA+PIP | High dose | Hypertension                                               |
|                |              |     |              |                                 |                                   |                                   |                                                   |                                               |                         |           | Congestive heart failure                                   |
|                |              |     |              |                                 |                                   |                                   |                                                   |                                               |                         |           | Unstable angina                                            |
| 7              | >=15yr       | M   | HP           | <i>P. vivax</i>                 | 7.8                               | 5.2                               | 6                                                 | 23                                            | DHA+PIP                 | High dose | Pneumonia                                                  |
| 8              | >=15yr       | M   | HP           | <i>P. vivax</i>                 | .                                 | 11.6                              | 18                                                | 25                                            | DHA+PIP                 | High dose | Hepatitis B                                                |
|                |              |     |              |                                 |                                   |                                   |                                                   |                                               |                         |           | Hepatic failure                                            |





|    |        |   |    |                 |      |     |    |    |                             |           |                                     |
|----|--------|---|----|-----------------|------|-----|----|----|-----------------------------|-----------|-------------------------------------|
| 25 | >=15yr | M | NP | Mixed species   | 8    | .   | .  | 3  | IV artesunate / clindamycin | Nil       | -                                   |
| 26 | >=15yr | M | HP | <i>P. vivax</i> | 9    | .   | .  | 3  | IV artesunate               | High dose | Intracranial space-occupying lesion |
| 27 | >=15yr | M | HP | Mixed species   | 3.5  | .   | .  | 3  | IV artesunate               | Low dose  | Chronic renal failure               |
| 28 | >=15yr | M | HP | <i>P. vivax</i> | 11.6 | .   | .  | 9  | IV artesunate / DHA+PIP     | High dose | Tuberculous meningitis              |
| 29 | >=15yr | F | NP | <i>P. vivax</i> | 10.1 | .   | .  | 4  | IV artesunate / DHA+PIP     | Nil       | Intracerebral haemorrhage           |
| 30 | 1-5yr  | M | HP | <i>P. vivax</i> | 9    | .   | .  | 5  | IV artesunate / DHA+PIP     | High dose | Miliary tuberculosis                |
|    |        |   |    |                 |      |     |    |    |                             |           | Kwashiorkor                         |
|    |        |   |    |                 |      |     |    |    |                             |           | Marasmus                            |
| 31 | 1-5yr  | M | LP | <i>P. vivax</i> | 5.4  | .   | .  | 10 | IV artesunate / DHA+PIP     | High dose | Septic shock                        |
|    |        |   |    |                 |      |     |    |    |                             |           | Trichuriasis                        |
|    |        |   |    |                 |      |     |    |    |                             |           | Protein-energy malnutrition         |
|    |        |   |    |                 |      |     |    |    |                             |           | Gastroenteritis                     |
| 32 | >=15yr | M | HP | Mixed species   | 9.9  | .   | .  | 3  | IV artesunate               | High dose | Pneumonia                           |
|    |        |   |    |                 |      |     |    |    |                             |           | Meningitis                          |
|    |        |   |    |                 |      |     |    |    |                             |           | HIV                                 |
|    |        |   |    |                 |      |     |    |    |                             |           | Unattended death                    |
| 33 | >=15yr | F | HP | <i>P. vivax</i> | 12   | .   | .  | 4  | IV artesunate               | High dose | Tuberculous meningitis              |
| 34 | 1-5yr  | F | HP | Mixed species   | 6.8  | 4.1 | 27 | 30 | DHA+PIP                     | High dose | Gastroenteritis                     |
|    |        |   |    |                 |      |     |    |    |                             |           | Severe protein-energy malnutrition  |
| 35 | >=15yr | F | HP | <i>P. vivax</i> | 8.5  | 8   | 4  | 26 | DHA+PIP                     | Nil       | Postpartum haemorrhage              |
| 36 | >=15yr | M | NP | <i>P. vivax</i> | 11.8 | .   | .  | 4  | DHA+PIP                     | Low dose  | Meningitis                          |
|    |        |   |    |                 |      |     |    |    |                             |           | Cardiac arrest, unspecified         |
| 37 | 1-5yr  | F | HP | Mixed species   | 9.9  | 7.4 | 9  | 12 | Artesunate +amodiaquine     | Nil       | Gastroenteritis                     |

|    |        |   |    |                 |      |      |    |    |                         |           |                                                                     |
|----|--------|---|----|-----------------|------|------|----|----|-------------------------|-----------|---------------------------------------------------------------------|
|    |        |   |    |                 |      |      |    |    |                         |           | Kwashiorkor                                                         |
|    |        |   |    |                 |      |      |    |    |                         |           | Marasmus                                                            |
|    |        |   |    |                 |      |      |    |    |                         |           | Pulmonary tuberculosis                                              |
| 38 | >=15yr | M | HP | Mixed species   | 8    | .    | .  | 7  | IV artesunate / DHA+PIP | High dose | Pulmonary tuberculosis                                              |
|    |        |   |    |                 |      |      |    |    |                         |           | Acute renal failure                                                 |
|    |        |   |    |                 |      |      |    |    |                         |           | Urinary tract infection                                             |
| 39 | 1-5yr  | M | HP | Mixed species   | 2.4  | .    | .  | 3  | IV artesunate / DHA+PIP | High dose | Hereditary haemolytic anaemia                                       |
| 40 | >=15yr | F | HP | <i>P. vivax</i> | 6.6  | 8.7  | 7  | 7  | DHA+PIP                 | High dose | Septicaemia                                                         |
| 41 | >=15yr | M | NP | Mixed species   | 10.2 | .    | .  | 13 | Artesunate +amodiaquine | Nil       | Pulmonary tuberculosis                                              |
| 42 | >=15yr | F | HP | <i>P. vivax</i> | 4.1  | .    | .  | 6  | IV artesunate / DHA+PIP | High dose | Trichomoniasis                                                      |
|    |        |   |    |                 |      |      |    |    |                         |           | Ischaemic cardiomyopathy                                            |
|    |        |   |    |                 |      |      |    |    |                         |           | Urinary tract infection                                             |
|    |        |   |    |                 |      |      |    |    |                         |           | Bronchitis                                                          |
| 43 | >=15yr | F | NP | <i>P. vivax</i> | 6.3  | .    | .  | 13 | IV artesunate / DHA+PIP | Low dose  | HIV                                                                 |
|    |        |   |    |                 |      |      |    |    |                         |           | Tuberculosis                                                        |
|    |        |   |    |                 |      |      |    |    |                         |           | Urinary tract infection                                             |
| 44 | >=15yr | M | HP | <i>P. vivax</i> | .    | 14.8 | 19 | 25 | DHA+PIP                 | High dose | Chronic bronchitis                                                  |
|    |        |   |    |                 |      |      |    |    |                         |           | COPD                                                                |
|    |        |   |    |                 |      |      |    |    |                         |           | Pneumonia                                                           |
| 45 | >=15yr | M | HP | <i>P. vivax</i> | 11.5 | .    | .  | 6  | IV artesunate / DHA+PIP | High dose | Meningitis                                                          |
|    |        |   |    |                 |      |      |    |    |                         |           | Urinary tract infection                                             |
| 46 | >=15yr | M | HP | <i>P. vivax</i> | 3.9  | .    | .  | 5  | IV artesunate / DHA+PIP | High dose | Postprocedural disorder of the nervous system not further specified |

|    |        |   |    |                 |      |      |    |    |                         |           |                                           |
|----|--------|---|----|-----------------|------|------|----|----|-------------------------|-----------|-------------------------------------------|
| 47 | >=15yr | M | HP | <i>P. vivax</i> | .    | 8.4  | 12 | 16 | DHA+PIP                 | High dose | Tuberculous meningitis                    |
| 48 | 1-5yr  | M | LP | <i>P. vivax</i> | .    | 7.2  | 7  | 7  | DHA+PIP                 | Low dose  | Marasmus                                  |
|    |        |   |    |                 |      |      |    |    |                         |           | Suspected tuberculosis                    |
|    |        |   |    |                 |      |      |    |    |                         |           | Septicaemia                               |
| 49 | >=15yr | M | HP | Mixed species   | 12   | .    | .  | 6  | IV artesunate / DHA+PIP | Nil       | Primary cardiomyopathy                    |
|    |        |   |    |                 |      |      |    |    |                         |           | Acute renal failure                       |
|    |        |   |    |                 |      |      |    |    |                         |           | Bronchitis                                |
| 50 | 5-15yr | F | NP | <i>P. vivax</i> | 2.1  | .    | .  | 8  | IV artesunate / DHA+PIP | Nil       | Unattended death                          |
| 51 | >=15yr | F | NP | Mixed species   | 13.7 | .    | .  | 8  | IV artesunate / DHA+PIP | High dose | -                                         |
| 52 | 1-5yr  | M | HP | <i>P. vivax</i> | .    | 10.9 | 7  | 16 | IV artesunate / DHA+PIP | Nil       | Pulmonary tuberculosis                    |
|    |        |   |    |                 |      |      |    |    |                         |           | Emphysema                                 |
|    |        |   |    |                 |      |      |    |    |                         |           | Measles                                   |
| 53 | >=15yr | F | HP | <i>P. vivax</i> | 8.7  | .    | .  | 17 | IV artesunate / DHA+PIP | High dose | Essential hypertension                    |
|    |        |   |    |                 |      |      |    |    |                         |           | Tuberculous peritonitis                   |
|    |        |   |    |                 |      |      |    |    |                         |           | Unattended death                          |
| 54 | >=15yr | M | HP | <i>P. vivax</i> | 8.9  | .    | .  | 10 | DHA+PIP                 | Low dose  | Stroke                                    |
|    |        |   |    |                 |      |      |    |    |                         |           | Bronchopneumonia                          |
| 55 | >=15yr | F | HP | <i>P. vivax</i> | 2.6  | .    | .  | 4  | IV artesunate           | High dose | Septic shock                              |
|    |        |   |    |                 |      |      |    |    |                         |           | Acute renal failure with tubular necrosis |
|    |        |   |    |                 |      |      |    |    |                         |           | Chronic renal failure                     |
| 56 | 1-5yr  | F | HP | <i>P. vivax</i> | 9.6  | .    | .  | 8  | IV artesunate / DHA+PIP | Nil       | Tuberculous meningitis                    |
| 57 | 1-5yr  | M | HP | <i>P. vivax</i> | .    | 9.4  | 10 | 14 | DHA+PIP                 | Nil       | Gastroenteritis                           |
|    |        |   |    |                 |      |      |    |    |                         |           | Dehydration                               |
|    |        |   |    |                 |      |      |    |    |                         |           | Pneumonitis due to food and vomit         |



|    |        |   |    |                 |      |      |    |    |                         |           |                                                |
|----|--------|---|----|-----------------|------|------|----|----|-------------------------|-----------|------------------------------------------------|
| 68 | >=15yr | M | NP | <i>P. vivax</i> | 13.2 | .    | .  | 7  | IV artesunate           | Nil       | Nontraumatic intracranial haemorrhage          |
| 69 | >=15yr | M | HP | <i>P. vivax</i> | 11.2 | 12.4 | 4  | 7  | DHA+PIP                 | High dose | Common cold                                    |
|    |        |   |    |                 |      |      |    |    |                         |           | HIV                                            |
|    |        |   |    |                 |      |      |    |    |                         |           | Candidiasis                                    |
|    |        |   |    |                 |      |      |    |    |                         |           | Tuberculous meningitis                         |
|    |        |   |    |                 |      |      |    |    |                         |           | Acute tubulo-interstitial nephritis            |
| 70 | 5-15yr | M | HP | Mixed species   | .    | 3.3  | 21 | 26 | DHA+PIP                 | Low dose  | Suspected tuberculosis                         |
| 71 | 5-15yr | F | HP | <i>P. vivax</i> | 11.8 | 9.4  | 7  | 18 | DHA+PIP                 | High dose | Pulmonary tuberculosis                         |
|    |        |   |    |                 |      |      |    |    |                         |           | Constipation                                   |
|    |        |   |    |                 |      |      |    |    |                         |           | Acute pharyngitis                              |
|    |        |   |    |                 |      |      |    |    |                         |           | Bacterial meningitis                           |
| 72 | >=15yr | M | HP | Mixed species   | .    | 8.6  | 23 | 23 | DHA+PIP                 | Low dose  | -                                              |
| 73 | >=15yr | F | HP | Mixed species   | 6.3  | .    | .  | 3  | IV artesunate / DHA+PIP | High dose | Dehydration                                    |
|    |        |   |    |                 |      |      |    |    |                         |           | Lobar pneumonia                                |
|    |        |   |    |                 |      |      |    |    |                         |           | Hypovolaemic shock                             |
| 74 | >=15yr | M | HP | Mixed species   | 8.2  | .    | .  | 9  | IV artesunate / DHA+PIP | High dose | Ventral hernia without obstruction or gangrene |
|    |        |   |    |                 |      |      |    |    |                         |           | Septic shock                                   |
| 75 | >=15yr | M | NP | <i>P. vivax</i> | .    | .    | .  | 4  | IV artesunate / DHA+PIP | Nil       | Essential hypertension                         |

**Abbreviations:** M=male, F=female, HP=Highland Papuan, LP=Lowland Papuan, NP= Non=Papuan, PQ=Primaquine, IV=intravenous, DHA+PIP= dihydroartemisinin-piperazine
