# Supplementary material for: The risk of adverse clinical outcomes following treatment of Plasmodium vivax malaria with and without primaquine in Papua, Indonesia
Source: PubMed Central journal article supplement (PMC7657498; doi:10.1371/journal.pntd.0008838), 2020-11-11
Supplement: pntd.0008838.s008.pdf [file pntd.0008838.s008.pdf]

**S6 Table:** Haematological and clinical details of the 36 patients whose Hb fell by >25% to below 7g/dl

| Patient number | Age cat   | Sex | Ethnic group | Malaria species at presentation | Hb in g/dl at initial presentation | Lowest Hb within 30 days in g/dl | Outcome at day 30 (death/alive) | PQ dose   |
|----------------|-----------|-----|--------------|---------------------------------|------------------------------------|----------------------------------|---------------------------------|-----------|
| 1              | >=15years | F   | LP           | Mixed Species                   | 5.8                                | 2.7                              | Alive                           | High dose |
| 2              | >=15years | M   | HP           | <i>P. vivax</i>                 | 7.8                                | 5.2                              | Death                           | High dose |
| 3              | >=15years | M   | LP           | <i>P. vivax</i>                 | 4.5                                | 3.2                              | Death                           | High dose |
| 4              | >=15years | F   | HP           | Mixed Species                   | 10.1                               | 6.2                              | Alive                           | High dose |
| 5              | 5-14years | F   | HP           | Mixed Species                   | 4.8                                | 3.6                              | Alive                           | High dose |
| 6              | 1-4years  | F   | HP           | <i>P. vivax</i>                 | 13.2                               | 6                                | Alive                           | High dose |
| 7              | 1-4years  | F   | HP           | Mixed Species                   | 6.8                                | 4.1                              | Death                           | High dose |
| 8              | >=15years | M   | HP           | Mixed Species                   | 12                                 | 4.1                              | Alive                           | High dose |
| 9              | 1-4years  | F   | HP           | Mixed Species                   | 8.8                                | 5.7                              | Alive                           | High dose |
| 10             | 1-4years  | F   | HP           | <i>P. vivax</i>                 | 10.7                               | 6.2                              | Alive                           | High dose |
| 11             | 5-14years | F   | HP           | <i>P. vivax</i>                 | 10.5                               | 6.2                              | Alive                           | High dose |
| 12             | 1-4years  | M   | HP           | Mixed Species                   | 8.8                                | 5                                | Alive                           | High dose |
| 13             | 5-14years | F   | HP           | Mixed Species                   | 9.9                                | 5.6                              | Alive                           | High dose |
| 14             | 5-14years | M   | HP           | <i>P. vivax</i>                 | 9.1                                | 5.7                              | Alive                           | High dose |
| 15             | 1-4years  | M   | HP           | Mixed Species                   | 6.4                                | 4.4                              | Alive                           | High dose |
| 16             | 1-4years  | F   | HP           | <i>P. vivax</i>                 | 11.9                               | 4.2                              | Alive                           | High dose |
| 17             | >=15years | F   | HP           | Mixed Species                   | 6.9                                | 4.1                              | Alive                           | High dose |
| 18             | 1-4years  | F   | HP           | <i>P. vivax</i>                 | 7.2                                | 3                                | Alive                           | High dose |
| 19             | 5-14years | F   | HP           | <i>P. vivax</i>                 | 10.1                               | 6.1                              | Alive                           | High dose |
| 20             | >=15years | M   | HP           | Mixed Species                   | 9.6                                | 4.8                              | Alive                           | High dose |
| 21             | 5-14years | F   | HP           | Mixed Species                   | 8.3                                | 5.4                              | Alive                           | High dose |
| 22             | 5-14years | M   | HP           | Mixed Species                   | 7.9                                | 5.2                              | Alive                           | High dose |
| 23             | 1-4years  | F   | HP           | Mixed Species                   | 11.2                               | 4.9                              | Alive                           | High dose |
| 24             | 1-4years  | F   | HP           | <i>P. vivax</i>                 | 10.8                               | 6.3                              | Alive                           | High dose |
| 25             | >=15years | F   | HP           | <i>P. vivax</i>                 | 8.1                                | 5.2                              | Alive                           | Low dose  |
| 26             | 1-4years  | M   | NP           | <i>P. vivax</i>                 | 9.6                                | 6.2                              | Alive                           | Low dose  |
| 27             | 1-4years  | M   | HP           | Mixed Species                   | 4                                  | 2                                | Alive                           | Low dose  |
| 28             | 1-4years  | M   | HP           | <i>P. vivax</i>                 | 5.5                                | 2.7                              | Alive                           | Low dose  |
| 29             | >=15years | F   | HP           | <i>P. vivax</i>                 | 8.7                                | 5.4                              | Alive                           | Low dose  |

|    |           |   |    |                 |      |     |       |     |
|----|-----------|---|----|-----------------|------|-----|-------|-----|
| 30 | 1-4years  | F | HP | <i>P. vivax</i> | 9    | 5.8 | Alive | Nil |
| 31 | >=15years | F | NP | <i>P. vivax</i> | 7.4  | 5.1 | Alive | Nil |
| 32 | 1-4years  | F | HP | <i>P. vivax</i> | 3.5  | 2.1 | Alive | Nil |
| 33 | 1-4years  | M | HP | <i>P. vivax</i> | 10.1 | 3.9 | Alive | Nil |
| 34 | 5-14years | F | HP | Mixed Species   | 10.1 | 2.3 | Alive | Nil |
| 35 | 1-4years  | F | HP | <i>P. vivax</i> | 11.4 | 5.9 | Alive | Nil |
| 36 | 1-4years  | F | HP | <i>P. vivax</i> | 10.2 | 5   | Alive | Nil |

**Abbreviations:** M=male, F=female, HP=Highland Papuan, LP=Lowland Papuan, NP= Non=Papuan, PQ=Primaquine
